# Supplementary material
Source: publisher site journal article supplement (http://www.dovepress.com/get_supplementary_file.php?f=297046.docx)
Supplement: Supplementary file 1 [file get_supplementary_file.php]

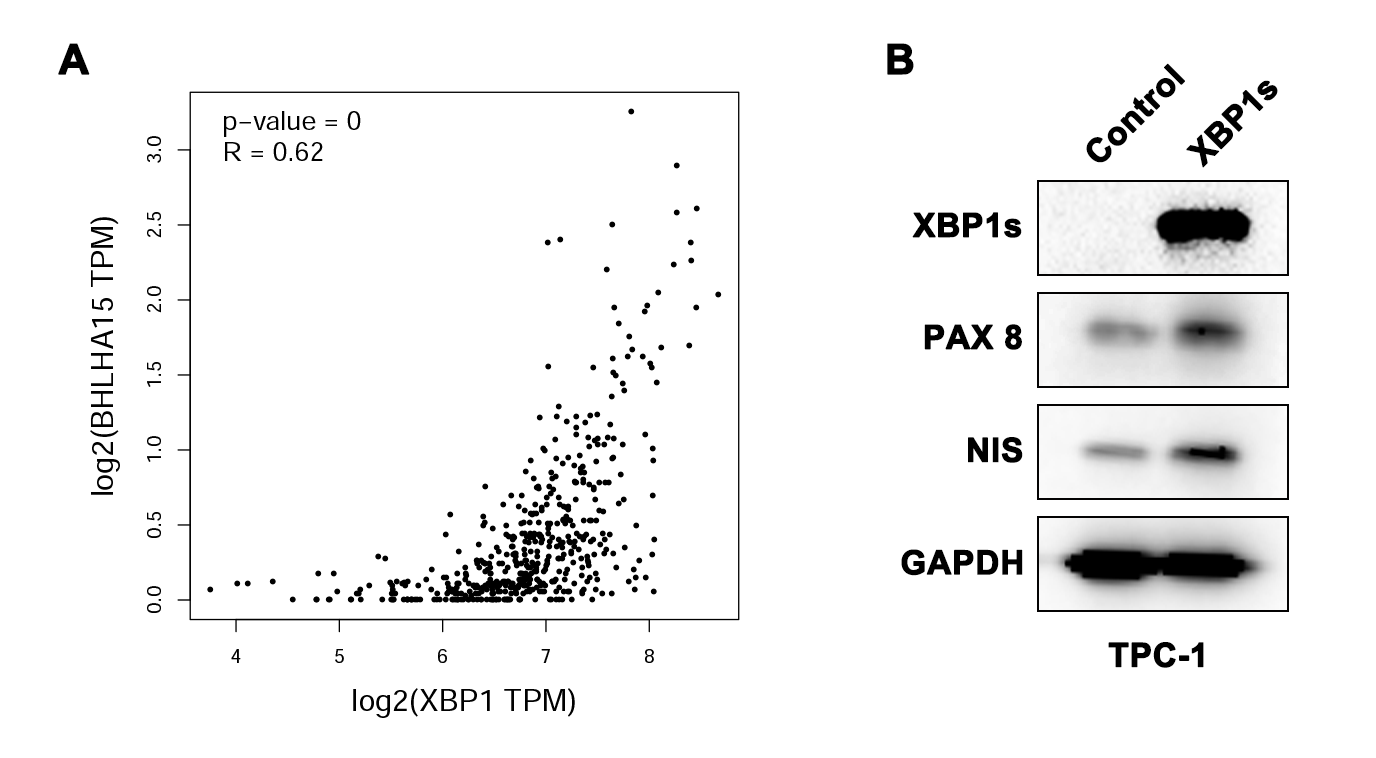


**Supp. Figure. (A)** the expression of XBP1 and Mist1 is closely related in thyroid carcinoma. **(B)** Western blot analysis of the expression of XBP1s and thyroid specific differentiation markers in TPC-1 cells.
